# Supplementary material for: Empagliflozin prevents cardiomyopathy via sGC-cGMP-PKG pathway in type 2 diabetes mice
Source: Oxford University Press journal article supplement (doi:10.1042/cs20190585), 2019-07-23
Supplement: cs-2019-0585_supp.pdf [file cs-2019-0585_supp.pdf]

## Supplementary table

**Supplementary table 1. Primers used for transcript quantification by RT-PCR**

| Gene <sup>a</sup>    | Primer sequences (5'-3') <sup>b</sup> |
|----------------------|---------------------------------------|
| Mus ANP F            | TCGGAGCCTACGAAGATCCA                  |
| Mus ANP R            | GTGGCAATGTGACCAAGCTG                  |
| Mus BNP F            | GTTTGGGCTGTAACGCACTG                  |
| Mus BNP R            | TTGTGGCAAGTTTGTGCTCC                  |
| Mus $\beta$ -MHC F   | CTTACTTGCTACCCTCAGGTGG                |
| Mus $\beta$ -MHC R   | ATGGCTGAGCCTTGGATTCTC                 |
| Mus TGF- $\beta$ F   | TGGCCAGATCCTGTCCAAAC                  |
| Mus TGF- $\beta$ R   | CATAGATGGCGTTGTTGCGG                  |
| Mus Collagen I F     | TTCTCCTGGCAAAGACGGAC                  |
| Mus Collagen I R     | CTCAAGGTCACGGTCACGAA                  |
| Mus Collagen III F   | CAAGGCTGCAAGATGGATGC                  |
| Mus Collagen III R   | TGCACCAGAATCTGTCCACC                  |
| Mus sGC- $\beta$ F   | ACAGGTGTCTCATGTCTCCA                  |
| Mus sGC- $\beta$ R   | GTGCTCCTTGCTTGACACAC                  |
| Mus SGLT2 F          | GCTGGATTTGAGTGGAATGC                  |
| Mus SGLT2 R          | CGGTCAGATACTGGCACA                    |
| Mus Fis1 F           | CAAAGAGGAACAGCGGGACT                  |
| Mus Fis1 R           | ACAGCCCTCGCACATACTTT                  |
| Mus Drp1 F           | ATGCCAGCAAGTCCACAGAA                  |
| Mus Drp1 R           | TGTTCTCGGGCAGACAGTTT                  |
| Mus Mfn1 F           | GCAGACAGCACATGGAGAGA                  |
| Mus Mfn1 R           | GATCCGATTCCGAGCTTCCG                  |
| Mus Mfn2 F           | TGCACCGCCATATAGAGGAAG                 |
| Mus Mfn2 R           | TCTGCAGTGAAGTGGCAATG                  |
| Mus $\beta$ -actin F | CCTCTATGCCAACACAGTGC                  |
| Mus $\beta$ -actin R | ACATCTGCTGGAAGGTGGAC                  |

<sup>a</sup> Mus, mouse; <sup>b</sup> F, forward primer; R, reverse primer.

**Supplementary table 2. General and echocardiographic features of db/db mice with or without insulin treatment.**

|                        | db/db      | db/db+insulin |
|------------------------|------------|---------------|
| Body weight (g)        | 49.67±3.89 | 51±3.69       |
| Blood glucose (mmol/L) | 27.03±2.84 | 16.40±2.90*** |

|               |            |            |
|---------------|------------|------------|
| HW/TL (mg/mm) | 10.69±1.40 | 10.34±0.81 |
| EF (%)        | 54.73±5.28 | 51.02±4.74 |
| FS (%)        | 29.58±3.65 | 27.68±2.93 |
| IVRT (ms)     | 23.46±2.50 | 24.92±3.17 |
| DT (ms)       | 33.54±3.69 | 35.66±2.86 |
| E/A           | 1.26±0.22  | 1.19±0.15  |

Mice in the db/db+insulin group (n=6) were injected the adjusted dose of insulin glargine (Sanofi-Aventis Pharmaceuticals, NJ) subcutaneously. Mice in the db/db (n=6) group were injected the same volume of normal saline as the db/db+insulin group. Data are presented as mean±SD, n=8 per group. \*\*\* $P<0.001$  represents significant differences between db/db and db/db+insulin mice. Abbreviations: DT, deceleration time; E/A, velocity of early mitral flow to velocity of late mitral flow ratio; EF, ejection fraction; FS, fraction shortening; HW/TL, heart weight to tibia length ratio; IVRT, isovolumetric relaxation time.

## Supplementary figures

### Supplementary figure 1

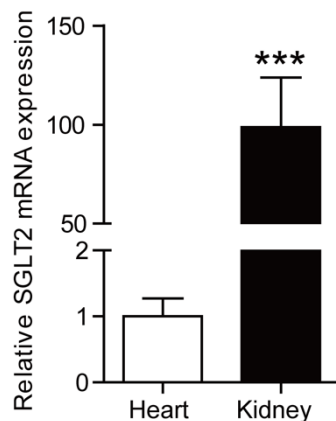

**Figure S1.** Relative mRNA expression of SGLT2 in heart and kidney. Data are presented as mean±SD, n=6 per group. \*\*\* $P<0.001$  represents significant differences between heart and kidney.

## Supplementary figure 2

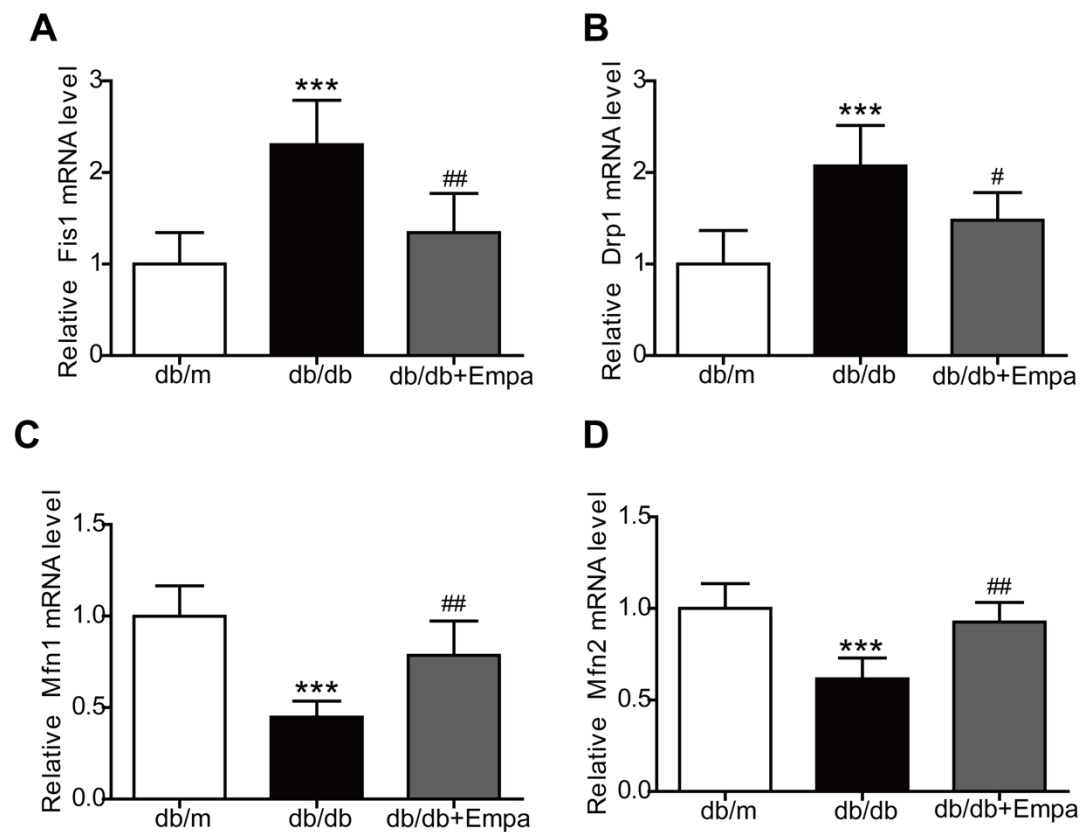

**Figure S2. Changes in proteins related to mitochondrial dynamics.** (A-D) mRNA expression of Fis1, Drp1, Mfn1 and Mfn2 was measured by quantitative RT-PCR, n=6 per group. \*\*\* $P < 0.001$  represents significant differences between db/m and db/db mice; ## $P < 0.01$  and # $P < 0.05$  represent significant differences between db/db and db/db+Empa. Abbreviations: Drp1, Dynamin related protein 1; Fis1, fission; Mfn1, mitofusin 1; Mfn2, mitofusin 2.

Supplementary figure 3

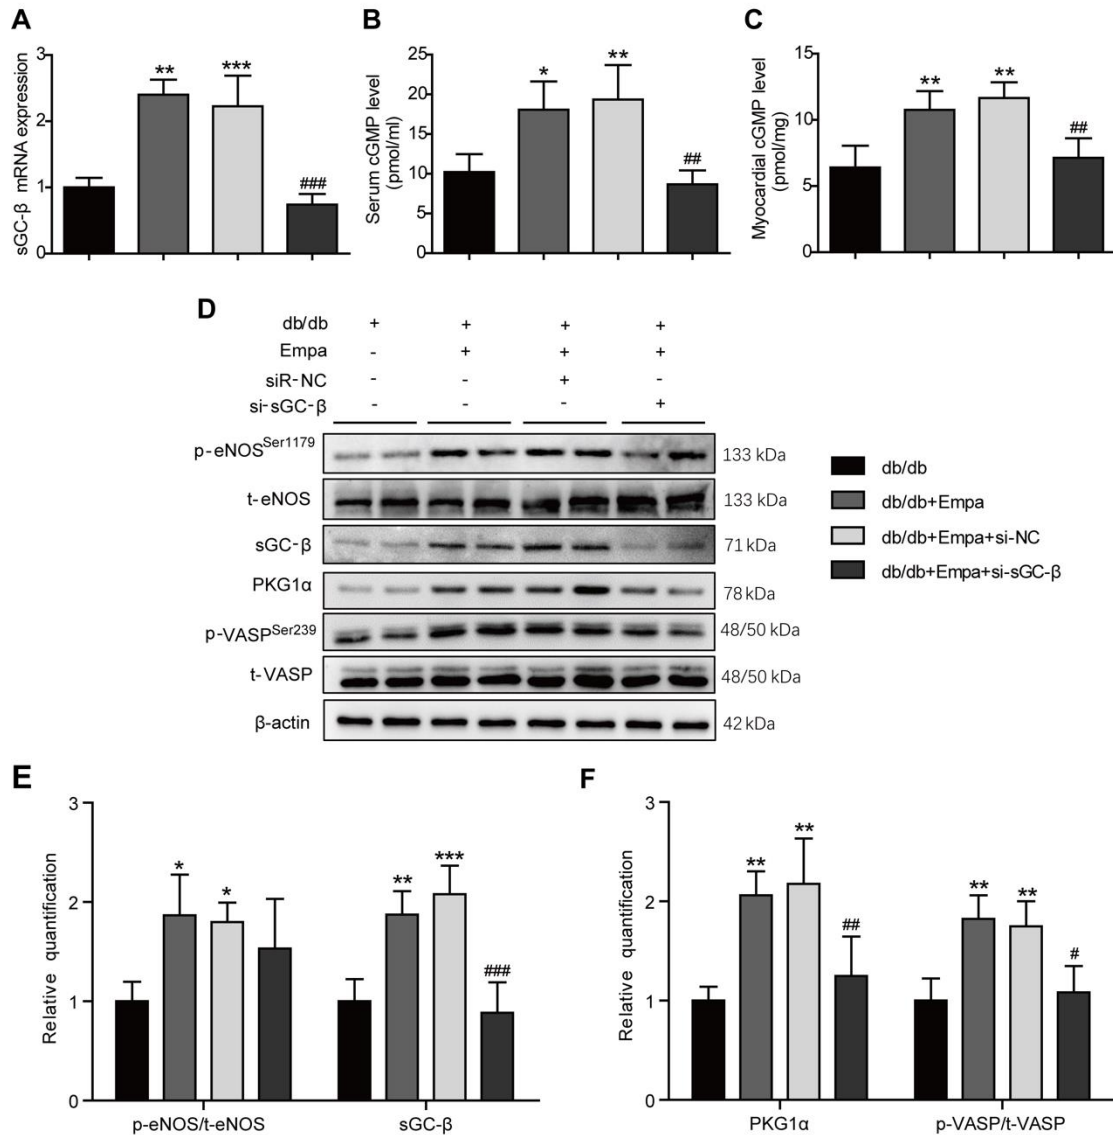

**Figure S3. Downregulation of sGC-β undermined the effect of empagliflozin on diabetic heart.** (A) mRNA expression of sGC-β was measured by quantitative RT-PCR after transfection in different groups, n=6 per group. (B-C) Representative levels of cGMP in serum and myocardium were evaluated by Elisa, n=4 per group. (D) Protein expression of p-eNOS, t-eNOS, sGC-β, PKG1α, p-VASP and t-VASP in myocardium were determined by western blot. (E-F) Quantitative analysis of p-eNOS/t-eNOS, sGC-β, PKG1α and p-VASP/t-VASP for western blot, n=4 per group. Data are presented as mean±SD. \*\*\* $P < 0.001$ , \*\* $P < 0.01$  and \* $P < 0.05$  represent significant differences between db/db and db/db+Empa mice; ### $P < 0.001$ ,

## $P < 0.01$  and # $P < 0.05$  represent significant differences between db/db+Empa+si-NC and db/db+Empa+si-sGC- $\beta$ .
